# Supplementary material for: Incidence, recurring admissions and mortality of severe bacterial infections and sepsis over a 22-year period in the population-based HUNT study
Source: PubMed Central journal article supplement (PMC9275692; doi:10.1371/journal.pone.0271263), 2022-07-12
Supplement: pone.0271263.s001.pdf [file pone.0271263.s001.pdf]

| ICD-10                           |                                                       | ICD-9       |                                                  |
|----------------------------------|-------------------------------------------------------|-------------|--------------------------------------------------|
| <b>Pneumonia</b>                 |                                                       |             |                                                  |
| J13                              | Pneumonia due to Streptococcus pneumoniae             | 481         | Pneumococcal pneumonia                           |
| J14                              | Pneumonia due to Haemophilus influenzae               | 482.2       | Pneumonia due to Hemophilus influenzae           |
| J15.0                            | Pneumonia due to Klebsiella pneumoniae                | 482.0       | Pneumonia due to Klebsiella pneumoniae           |
| J15.1                            | Pneumonia due to Pseudomonas                          | 482.1       | Pneumonia due to Pseudomonas                     |
| J15.2                            | Pneumonia due to Staphylococcus                       | 482.4       | Pneumonia due to Staphylococcus                  |
| J15.3                            | Pneumonia due to Streptococcus, group B               | 482.3       | Pneumonia due to Streptococcus                   |
| J15.4                            | Pneumonia due to other streptococci                   |             |                                                  |
| J15.5                            | Pneumonia due to Escherichia coli                     | 482.8       | Pneumonia due to other specified organism        |
| J15.6                            | Pneumonia due to other gram negative bacteria         |             |                                                  |
| J15.7                            | Pneumonia due to Mycoplasma pneumoniae                | 483.0       | Pneumonia due to other specified organism        |
| J15.8                            | Other bacterial pneumonia                             |             |                                                  |
| J15.9                            | Bacterial pneumonia, unspecified                      | 482.9       | Bacterial pneumonia, unspecified                 |
| J16                              | Chlamydial pneumonia                                  |             |                                                  |
| J16.8                            | Pneumonia due to other specified infectious organisms |             |                                                  |
| J18.0                            | Bronchopneumonia, unspecified                         | 485         | Bronchopneumonia, organism unspecified           |
| J18.1                            | Lobar pneumonia, unspecified                          |             |                                                  |
| J18.8                            | Other pneumonia, organism unspecified                 | 486         | Pneumonia, organism unspecified                  |
| J18.9                            | Pneumonia, unspecified                                |             |                                                  |
| A48.1                            | Legionnaires's disease                                |             |                                                  |
| <b>Intraabdominal infections</b> |                                                       |             |                                                  |
| K35.0-K35.8                      | Acute appendicitis                                    | 540.0-540.9 | Acute appendicitis                               |
| K37                              | Unspecified appendicitis                              |             |                                                  |
| K65.0                            | Peritonitis                                           | 567.0-567.9 | Peritonitis and retroperitoneal infections       |
| K80.0                            | Calculus of gallbladder with acute cholecystitis      | 574.0       | Calculus of gallbladder with acute cholecystitis |
| K80.3-K80.4                      | Calculus of bile duct with cholangitis                | 574.3       | Calculus. of bile duct with acute cholecystitis  |
| K81.0                            | Acute cholecystitis                                   | 575.0       | Acute cholecystitis                              |
| K83.0                            | Cholangitis                                           | 576.1       | Cholangitis                                      |
| <b>Urinary tract infections</b>  |                                                       |             |                                                  |
| N10                              | Acute tubule-interstitial nephritis                   | 590.0-590.9 | Infections of kidney                             |
| N12                              | Tubulo-interstitial nephritis, not specified          |             |                                                  |
| N39.0                            | Urinary tract infections, site not specified          | 599.0       | Urinary tract infection, site not specified      |
| <b>Central nervous system</b>    |                                                       |             |                                                  |
| A39.0-A39.9                      | Meningococcal infection                               | 320.5       | Meningococcal meningitis                         |
| G00.0                            | Haemophilus meningitis                                | 320.0       | Haemophilus meningitis                           |
| G00.1                            | Pneumococcal meningitis                               | 320.1       | Pneumococcal meningitis                          |

|                                         |                                                                                         |        |                                                                            |
|-----------------------------------------|-----------------------------------------------------------------------------------------|--------|----------------------------------------------------------------------------|
| G00.2                                   | Streptococcal meningitis                                                                | 320.2  | Streptococcal meningitis                                                   |
| G00.3                                   | Staphylococcal meningitis                                                               |        |                                                                            |
| G00.8                                   | Other bacterial meningitis                                                              | 320.8  | Meningitis due to other specified bacteria                                 |
| G00.9                                   | Bacterial meningitis, unspecified                                                       | 320.9  | Meningitis due to unspecified bacterium                                    |
| G01                                     | Meningitis in bacterial disease classified elsewhere                                    | 320.7  | Meningitis in other bacterial diseases                                     |
| G04.2                                   | Bacterial meningoencephalitis and meningomyelitis                                       |        |                                                                            |
| <b>Skin- and soft tissue infections</b> |                                                                                         |        |                                                                            |
| A46                                     | Erysipelas                                                                              | 035    | Erysipelas                                                                 |
| L03.1                                   | Cellulitis and acute lymphangitis of other parts of limb                                |        |                                                                            |
| L03.2                                   | Cellulitis and acute lymphangitis of face and neck                                      |        |                                                                            |
| L03.3                                   | Cellulitis and acute lymphangitis of trunk                                              |        |                                                                            |
| L03.8                                   | Cellulitis and acute lymphangitis of other sites                                        |        |                                                                            |
| L03.9                                   | Cellulitis and acute lymphangitis, unspecified                                          |        |                                                                            |
| M72.6                                   | Necrotizing fasciitis                                                                   | 728.86 | Necrotizing fasciitis                                                      |
|                                         |                                                                                         | 729.4  | Fasciitis unspecified                                                      |
| M00.0-M00.9                             | Pyogenic arthritis                                                                      | 711.0  | Pyogenic arthritis                                                         |
| M01.3                                   | Direct infections of joint in infectious and parasitic diseases classified elsewhere    |        |                                                                            |
| M86.0                                   | Acute haematogenous osteomyelitis                                                       | 730.0  | Acute osteomyelitis                                                        |
| M86.1                                   | Other acute osteomyelitis                                                               | 730.2  | Unspecified osteomyelitis                                                  |
| M86.2                                   | Subacute osteomyelitis                                                                  | 730.9  | Unspecified infection of bone                                              |
| M86.9                                   | Osteomyelitis unspecified                                                               |        |                                                                            |
| <b>Sepsis</b>                           |                                                                                         |        |                                                                            |
| A40.0-A40.9                             | Streptococcal sepsis                                                                    | 785.5  | Shock                                                                      |
| A41.0-A41.9                             | Other sepsis                                                                            |        |                                                                            |
| A48.3                                   | Toxic shock syndrome                                                                    |        |                                                                            |
| R57.2                                   | Septic shock                                                                            |        |                                                                            |
| B95.0-B95.8                             | Streptococcus and staphylococcus as the cause of diseases classified to other chapters. |        |                                                                            |
| B96.0-B96.8                             | Other specified bacterial agents as the cause of diseases classified to other chapters  |        |                                                                            |
| <b>Endocarditis</b>                     |                                                                                         |        |                                                                            |
| I33.0                                   | Acute and subacute infective endocarditis                                               | 421.0  | Acute and subacute bacterial endocarditis                                  |
| I33.9                                   | Acute endocarditis, unspecified                                                         | 421.1  | Acute and subacute infective endocarditis in diseases classified elsewhere |
| I38                                     | Endocarditis, valve unspecified                                                         | 421.9  | Acute endocarditis, unspecified                                            |
