# Supplementary material for: Incidence, recurring admissions and mortality of severe bacterial infections and sepsis over a 22-year period in the population-based HUNT study
Source: PubMed Central journal article supplement (PMC9275692; doi:10.1371/journal.pone.0271263), 2022-07-12
Supplement: pone.0271263.s002.pdf [file pone.0271263.s002.pdf]

**Supplementary table 2: Seasonal differences in incidence rates.**

| <b>Focus of infection</b> | <b>Incidence rate per<br/>100 000/year (with<br/>95% CI)</b> | Incidence rate<br>autumn/winter | Incidence rate<br>spring/sommer |
|---------------------------|--------------------------------------------------------------|---------------------------------|---------------------------------|
| <b>Pneumonia</b>          | 639 (625-653)                                                | 341(331-352)                    | 298 (289-308)                   |
| <b>UTI</b>                | 550 (537-563)                                                | 282 (273-291)                   | 268 (259-277)                   |
| <b>Sepsis/bacteraemia</b> | 334 (324-345)                                                | 151 (145-158)                   | 144 (137-151)                   |
| <b>SSTI</b>               | 115 (109-121)                                                | 54.5 (50.5-58.7)                | 60.5 (56.3-65.0)                |
