# Supplementary material for: Incidence, recurring admissions and mortality of severe bacterial infections and sepsis over a 22-year period in the population-based HUNT study
Source: PubMed Central journal article supplement (PMC9275692; doi:10.1371/journal.pone.0271263), 2022-07-12
Supplement: pone.0271263.s003.pdf [file pone.0271263.s003.pdf]

**Supplementary table 3. Summary of results divided into eight different foci of infection, males.**

| <b>Focus of infection</b> | <b>Total admissions (n)</b> | <b>First-time admissions (n)</b> | <b>Incidence rate per 100 000/year (with 95% CI)</b> | <b>Proportion with recurrent infection (% with 95% CI)</b> | <b>Proportion with positive blood culture (% with 95% CI)</b> | <b>30-day mortality (% with 95% CI)</b> |
|---------------------------|-----------------------------|----------------------------------|------------------------------------------------------|------------------------------------------------------------|---------------------------------------------------------------|-----------------------------------------|
| <b>Pneumonia</b>          | 7,355                       | 4,235                            | 739 (717-761)                                        | 28.6 (27.3-30.0)                                           | 4.7 (4.1-5.4)                                                 | 17.6 (16.5-18.7)                        |
| <b>UTI</b>                | 4,526                       | 2,573                            | 449 (431-467)                                        | 28.0 (26.3-29.8)                                           | 8.5 (7.5-9.6)                                                 | 10.3 (9.1-11.5)                         |
| <b>Sepsis/bacteraemia</b> | 3,411                       | 2,002                            | 350 (355-366)                                        | 18.9 (17.2-20.7)                                           | 40.9 (38.8-43.1)                                              | 15.3(13.8-16.9)                         |
| <b>IAI</b>                | 1,380                       | 958                              | 166 (157-178)                                        | 11.5 (9.6-13.7)                                            | 11.8 (9.9-14.0)                                               | 4.0 (2.9-5.4)                           |
| <b>SSTI</b>               | 1,037                       | 692                              | 121 (112-130)                                        | 15.2 (12.7-18.0)                                           | 4.4 (3.1-6.2)                                                 | 3.3 (2.2-5.0)                           |
| <b>Bone/joint</b>         | 151                         | 97                               | 16.9 (13.9-20.7)                                     | 16.5 (10.3-25.3)                                           | 17.5 (11.1-26.5)                                              | 9.8 (4.9-16.9)                          |
| <b>Endocarditis</b>       | 152                         | 63                               | 11.0 (8.6-14.1)                                      | 15.9 (8.7-27.2)                                            | 38.1(26.9-50.7)                                               | 15.9 (8.7-2.7)                          |
| <b>CNS</b>                | 55                          | 34                               | 5.9 (4.2-8.3)                                        | 2.9 (0.4-18.7)                                             | 50.0 (33.5-66.5)                                              | 11.8 (4.4-27.9)                         |
