# Supplementary material for: Incidence, recurring admissions and mortality of severe bacterial infections and sepsis over a 22-year period in the population-based HUNT study
Source: PubMed Central journal article supplement (PMC9275692; doi:10.1371/journal.pone.0271263), 2022-07-12
Supplement: pone.0271263.s004.pdf [file pone.0271263.s004.pdf]

**Supplementary table 4: Summary of results divided into eight different foci of infection, females**

| <b>Focus of infection</b> | <b>Total admissions (n)</b> | <b>First-time admissions (n)</b> | <b>Incidence rate per 100 000/year (with 95% CI)</b> | <b>Proportion with recurrent infection (% with 95% CI)</b> | <b>Proportion with positive blood culture (% with 95% CI)</b> | <b>30-day mortality (% with 95% CI)</b> |
|---------------------------|-----------------------------|----------------------------------|------------------------------------------------------|------------------------------------------------------------|---------------------------------------------------------------|-----------------------------------------|
| <b>Pneumonia</b>          | 5,855                       | 3,713                            | 554 (537-573)                                        | 25.5 (24.1-26.9)                                           | 5.2 (4.5-6.0)                                                 | 13.4 (12.4-14.6)                        |
| <b>UTI</b>                | 6,895                       | 4,266                            | 637 (618-656)                                        | 26.6 (25.3-28.0)                                           | 6.8 (6.1-7.6)                                                 | 7.4 (6.6-8.2)                           |
| <b>Sepsis/bacteraemia</b> | 3,545                       | 2,154                            | 322 (309-336)                                        | 18.7 (17.1-20.3)                                           | 34.4 (32.4-36.4)                                              | 11.5(10.2-12.9)                         |
| <b>IAI</b>                | 1,524                       | 1,050                            | 156 (147-166)                                        | 11.1 (9.4-13.2)                                            | 8.0 (6.5-9.8)                                                 | 3.3 (2.4-4.6)                           |
| <b>SSTI</b>               | 1,167                       | 737                              | 110 (102-118)                                        | 16.1 (13.7-19.0)                                           | 5.1 (3.8-6.9)                                                 | 3.1 (2.1-4.7)                           |
| <b>Bone/joint</b>         | 96                          | 76                               | 11.3 (9.1-14.2)                                      | 7.9 (3.6-16.6)                                             | 21.1 (13.3-31.7)                                              | 3.9 (1.3-11.6)                          |
| <b>Endocarditis</b>       | 86                          | 33                               | 4.9 (3.5-6.9)                                        | 24.2 (12.5-41.8)                                           | 42.4 (26.8-59.7)                                              | 30.3 (17.0-50.0)                        |
| <b>CNS</b>                | 63                          | 31                               | 4.6 (3.3-6.6)                                        | 16.1 (6.8-33.8)                                            | 31.3 (17.5-49.3)                                              | 3.2 (0.4-20.3)                          |
